# Supplementary material for: Identification of small RNAs in Mycobacterium tuberculosis
Source: PubMed Central journal article supplement (PMC2764107; doi:10.1111/j.1365-2958.2009.06777.x), 2009-07-10
Supplement: mmi0073-0397-SD1.pdf [file mmi0073-0397-SD1.pdf]

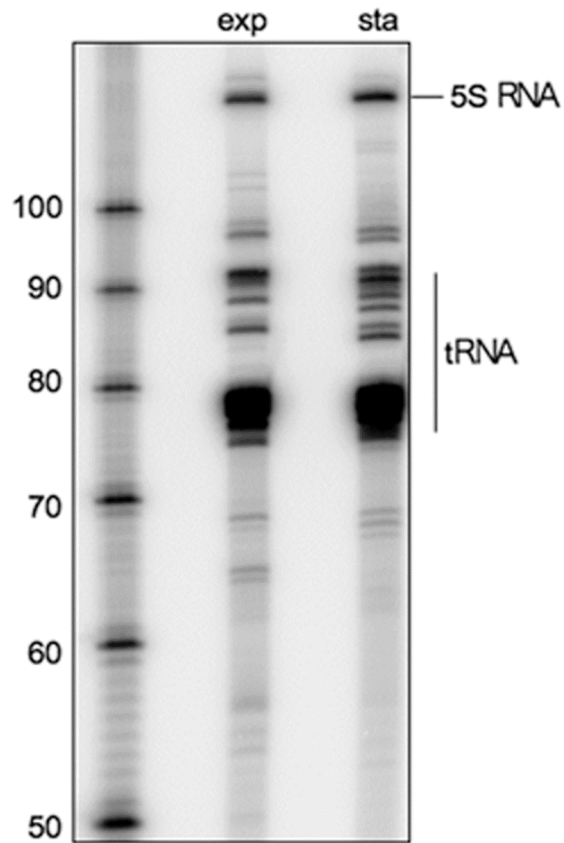

**Fig. S1.** Small transcripts are differentially expressed in exponential and stationary phase cultures of *M. tuberculosis*

RNA extracted from exponential (exp) and stationary (sta) phase cultures was depleted for rRNA, radio-labelled at the 3' end, and analysed by acrylamide gel electrophoresis and phosphorimager. Size marker is shown in the left lane.

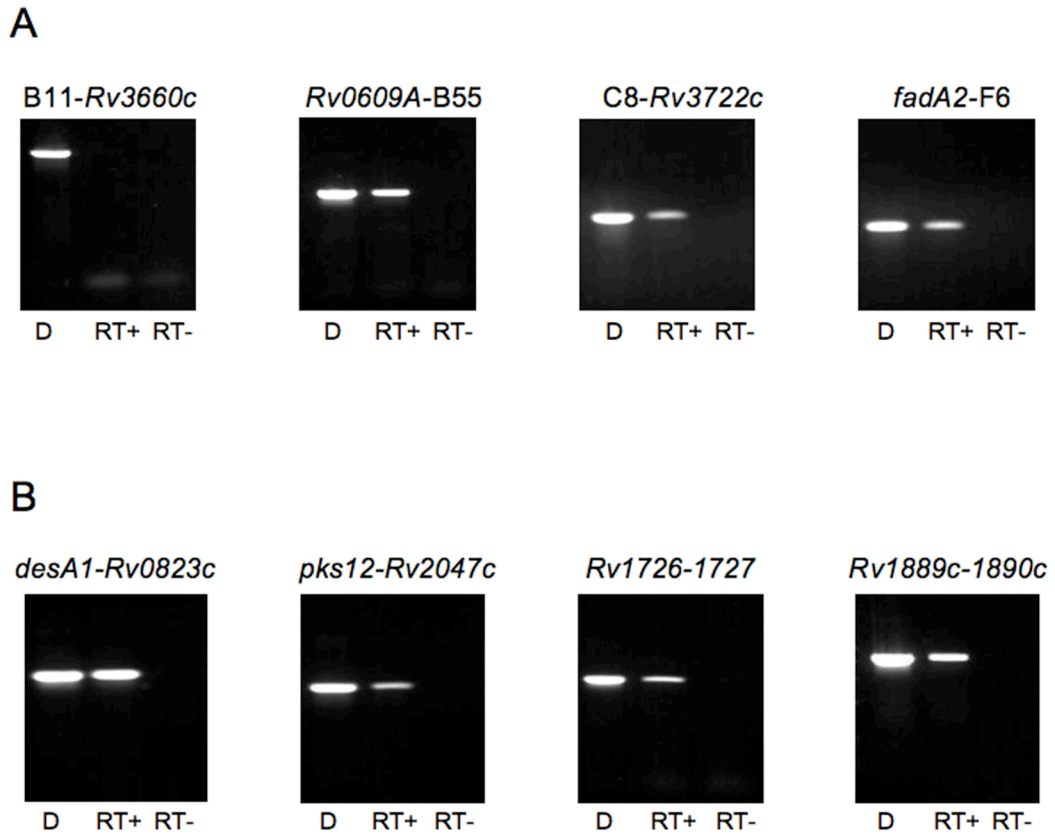

**Fig. S2.** RT-PCR analysis of transcriptional coupling

**A** illustrates results of RT-PCR analysis of transcriptional coupling between *trans*-encoded sRNA candidates and adjacent ORFs. B55, F6 and C8 were found to be co-transcribed with ORF-encoding mRNAs; B11 was present on a separate transcript. (G2 is transcribed in the opposite orientation to both flanking ORFs). D, DNA control; RT+, reverse transcription in the presence of reverse transcriptase; RT-, reverse transcription in the absence of reverse transcriptase

**B** illustrates RT-PCR analysis to explore whether ORFs containing *cis*-encoded sRNAs are co-transcribed with adjacent ORFs. Demonstration of a single transcript in each case suggests the potential for sRNA-dependent modulation of the ratio between target gene and its downstream partner.

|     |          |             |           |                     |     |          |                            |    |       |
|-----|----------|-------------|-----------|---------------------|-----|----------|----------------------------|----|-------|
|     | 10       | 20          | 30        | 40                  | 50  | 60       | 70                         | 80 | 90    |
| Mtb | TACTCGGC | CATAGCCGAGG | GTGTATCAG | CCGACCCCCCGGGGCTGAT | GCA | GACGACCT | CGCCTCCTCCCCCTGGCGGGGGTCGT | CC | CTTTT |
| Msm | TACTCGGC | TTATGCCGAGG | TGTATCAG  | CCGACCCCCCGGGGCTGAT | ACG | GACGACCT | CGCCTCCTCCCCCTGGCGGGGGTCGT | TT | CTTTT |

**B11**

|     |           |            |                |              |           |                  |                     |               |       |     |
|-----|-----------|------------|----------------|--------------|-----------|------------------|---------------------|---------------|-------|-----|
|     | 10        | 20         | 30             | 40           | 50        | * 60             | 70                  | 80            | 90    | 100 |
| Mtb | CGGATAGCC | CCGTGTTGTT | GTCTGACCCCCGAC | CCCGACGGCAAT | GCGGGCAAT | CCCTGGAAAGGGCCGC | CGCTGGTGGGAGGG      | ACCCAGCGGGGTC | TTTTT |     |
| Msm | CGAGTAGCT | CCGTGTTGC  | GTCTGACCCCCGAC | CCCGACGGCAAC | GCGGGCAAT | TACTTCGA         | GACCCGATGCGGACAGTGC | GTTCGATCGAAAT | TTCC  |     |

**F6**

**Fig. S3.** Sequence conservation of sRNAs

Alignment of the *M. tuberculosis* B11 and F6 sRNAs with their homologues from the non-pathogenic *M. smegmatis*. Identical nucleotides are boxed in grey. The 3' end of *M. tuberculosis* F6, mapped by RACE, is shown by asterisk.

B11 (96 nt)  
C:G ratio 1.2  
 $\Delta G = -57.4$

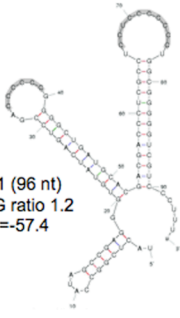

B55 (61nt)  
C:G ratio 0.9  
 $\Delta G = -39.7$

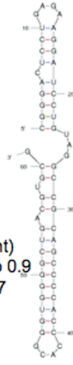

C8 (70nt)  
C:G ratio 1.0  
 $\Delta G = -22.0$

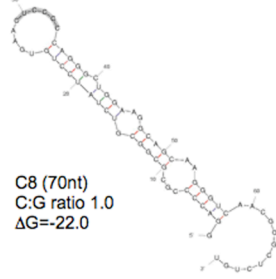

F6 (58nt)  
C:G ratio 1.1  
 $\Delta G = -32.6$

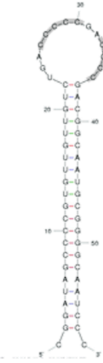

G2 (67 nt)  
C:G ratio 1.3  
 $\Delta G = -28.2$

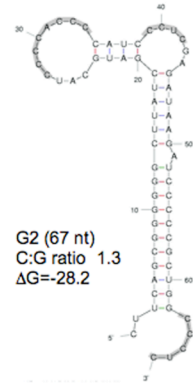

ASdes (68nt)  
C:G ratio 1.1  
 $\Delta G = -21.3$

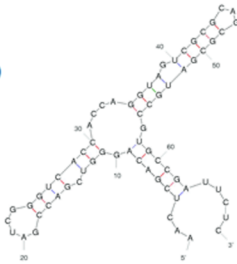

ASpks (78nt)  
C:G ratio 1.5  
 $\Delta G = -14.9$

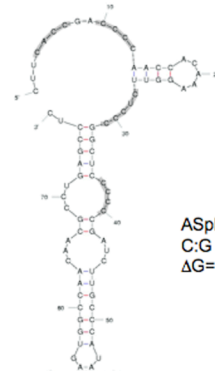

AS1726 (77nt)  
C:G ratio 1.1  
 $\Delta G = -29.0$

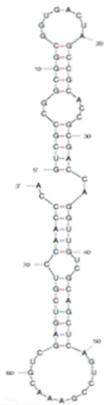

AS1890 (109nt)  
C:G ratio 1.1  
 $\Delta G = -22.6$

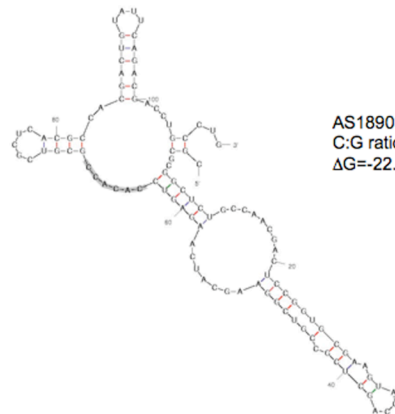

**Fig. S4.** Predicted structures of sRNAs according to *mfold*

Representative examples of predicted sRNA structures, i. e. one for each sRNA. Structure predictions indicate stable, compact molecules with a high degree of secondary structure. C-rich single-stranded regions are highlighted in grey.

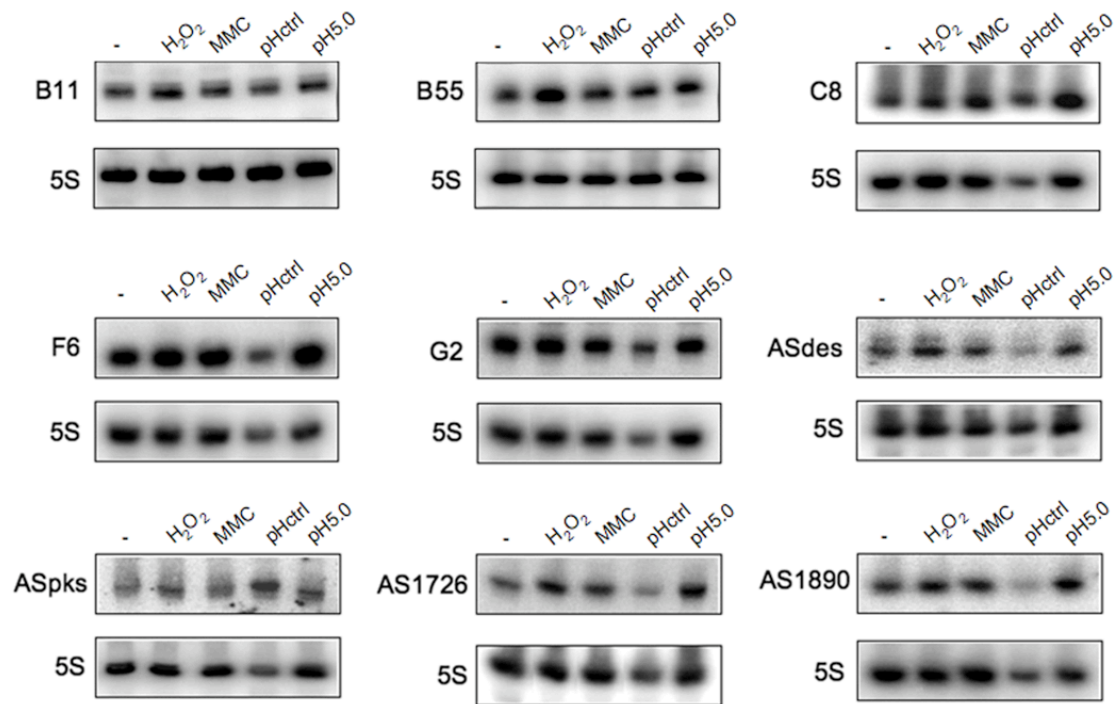

**Fig. S5.** Stress responses of *M. tuberculosis* sRNAs

The panels show representative Northern blots of RNA isolated from stressed *M. tuberculosis* upon stress. The 5S RNA band used for normalisation is included in each case. Lanes, -: exponentially grown culture; H<sub>2</sub>O<sub>2</sub> treated; MMC: Mitomycin C treated; 4: pH control; 5: acid stress, pH 5.0.

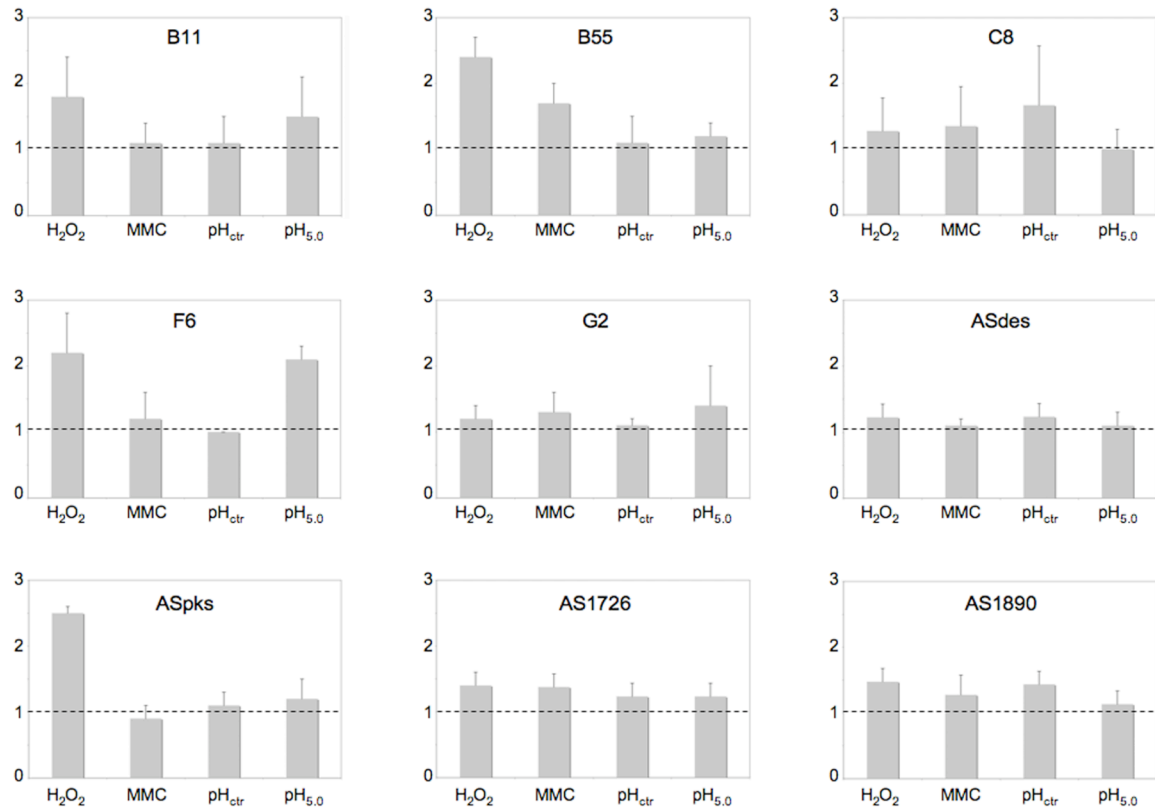

**Fig. S6.** Stress responses of *M. tuberculosis* sRNAs

Diagrams showing the average changes in expression of each sRNA determined by Northern blotting. Each value represents the mean of three to four independent experiments, normalized to 5S RNA and shown with standard deviation. The value of each sample is normalised to the appropriate control samples (i. e. H<sub>2</sub>O<sub>2</sub> and Mitomycin C (MMC) are relative to exponential growth and pH 5.0 is relative to pH control).

**Table S1: oligos used in this study****Oligos for library construction**

|               |                                                 |
|---------------|-------------------------------------------------|
| RNA 5' linker | CGACUGGAGCACGAGGACACUGACAUGGACUGAAGGAGUAGAAA    |
| GRdG3'A/C/G/T | GCTGTCAACGATACGCTACGTAACGGCATGACAGT(G)10A/C/G/T |
| GR5'          | C GACTGGAGCACGAGGACACTGA                        |
| GR3'          | GCTGTCAACGATACGCTACGTAACG                       |

**Template oligos for Riboprobes\***

|            |                                              |
|------------|----------------------------------------------|
| B11-nrt    | GGCCATAGCCGAGGGTGTATCAGTCCGACCCCCCTGTCTC     |
| B55-nrt    | CGGGACTCCTGAGAAGGATCCTGTAGGCCGCAGCCTGTCTC    |
| C8-nrt     | GGACCCCGCGGCGTCTATCCTGTGAACCTGTCTC           |
| F6-nrt     | CGGATAGCCCCGTGTTGTTGTCTGACCTGTCTC            |
| G2-nrt     | ATCGATGCATCCCCACCCCATCCCTCGAGATAAGCCTGTCTC   |
| ASpks-nrt  | CAACGCCTGAGCCTCAATCGGATCCCCAACGTGGCCTGTCTC   |
| ASdes-nrt  | TCTCCTCGGCGGTCCACCGGTTGACCCACTCCTGTCTC       |
| AS1726-nrt | AGTCCGAAACGTCGAGTCGTCCAACCCCTGTCTC           |
| AS1890-nrt | TCACGCCACGACTGTATTTCAGACGACCTGCCTGCCTGTCTC   |
| 5S-nrt     | GTCCCATTCGAAACCCGGAAGCTAAGCCTGCCAGCGCCTGTCTC |

**Oligos for RACE**

|          |                                            |
|----------|--------------------------------------------|
| GR5'     | C GACTGGAGCACGAGGACACTGA                   |
| GRdT     | GCTGTCAACGATACGCTACGTAACGGCATGACAGTGT(T)24 |
| GR3'     | GCTGTCAACGATACGCTACGTAACG                  |
| B11.f    | GCTGATGCACGACGACCCTCGC                     |
| B11.r    | CCGGGGGGTTCGGACTGATACACC                   |
| B55.f    | CGGGACTCCTGAGAAGGATCCTGTAGGCCGC            |
| B55.r    | CTGCGGCCTACAGGATCCTTCTCAGG                 |
| C8.f     | CCCCGCGGCGTCTATCCTGTG                      |
| C8.r     | TCACAGGATAGACGCCGCGGGG                     |
| F6.f     | CGGATAGCCCCGTGTTGTTGTCTGACCCCC             |
| F6.r     | TCAGACAACAACACGGGGCTATCC                   |
| G2.f     | CCAGGCTTCAGCGGGGGGCTTATCG                  |
| G2.r     | CTTATCTCGAGGGATGGGGTGGGGATGC               |
| ASpks.f  | GGCCAACAACGCCTGAGCCTC                      |
| ASpks.r  | GGGACCACGGTGGGGATCCGATTGAG                 |
| ASdes.f  | GCGCGATGCCGTGCCGATTCTC                     |
| ASdes.r  | GTCAACCGTTGGACCGCCGAGGAG                   |
| AS1726.f | AGTCCGAAACGTCGAGTCGTCCAACCC                |
| AS1726.r |                                            |
| AS1890.f | TCACGCCACGACTGTATTTCAGACGACCTGCCTG         |
| AS1890.r | GGCAGGTCTGCTGAATACAGTCGTGGCGTG             |

**oligos for RT-PCR**

|            |                                |
|------------|--------------------------------|
| RT-B11.F   | (same as B11.f)                |
| RT-3660.R  | CGCCAGGGCAACCGCAAACAAC         |
| RT-0609.F  | GCGGTGCGAGGCTCACGGGTACGACTATTT |
| RT-B55.R   | GGGGCTGCGGCCTACAGGATCCTTCTCAG  |
| RT-C8.F    | GCGCGGCGTCTATCCTGT             |
| RT-3722.R  | GCCCTCCGGGTGCGGGTAGTCGTCT      |
| RT-fadA2.F | GCGGGCACCAGGTGGGCGGATTTT       |
| RT-F6.R    | TCGGGGTTCAGACAACAACACGGGGCTATC |
| RT-desA1.F | CGAGCTGGCCTGCGACAAGT           |
| RT-0823.R  | CTGCAGCGAGCGTGGTGATTC          |
| RT-2048.F  | CGCCGACCGCAGAACAAGAGAT         |
| RT-2047.R  | TTCGGCCACGCACCCACGCACAAT       |
| RT-1726.F  | ACGGGCTGGGCACCGCGTATGTGAACTT   |
| RT-1727.R  | GCGTCGGCGAGGAGTAGCTGTGCGCTTCTA |



**Table S1:** oligos used in this study (continued)

---

**Oligos for overexpression plasmids**

|        |                                                                             |
|--------|-----------------------------------------------------------------------------|
| B11.F  | AAAAGCTTGGTACTCGGCCATAGCCGAGGGTG                                            |
| B11.R  | TTAAGCTTAAAAGGGACGACCCCGCCAG                                                |
| F6.F   | AGCTTGGCGGATAGCCCGTGTGTGTCTGACCCCGACCCCGACGGCAATGCGGGGCAATCCCA              |
| F6.R   | AGCTTGGGATTGCCCGCATTGCCGTCGGGGTCGGGGTCAGACAACAACACGGGGCTATCCGCCA            |
| G2.F   | AGCTTGGCTTCAGCGGGGGGCTTATCGATGCATCCCCACCCCATCCCTCGAGATAAGATCCCCCGCTGGCCCTCA |
| G2.R   | AGCTTGAGGGCCAGCGGGGGATCTTATCTCGAGGGATGGGGTGGGGATGCATCGATAAGCCCCCGCTGAAGCCA  |
| Term.F | AGCTTCCCCGCGAAAGCGGGTTTTTTTTTTT                                             |
| Term.R | AGCTAAAAAAAAAACCCCGCTTTCGCGGGGA                                             |

---

\* The 3'ends of template oligos are complementary to the T7 promoter oligo supplied in probe construction kit

**Table S2.** Induction fold of *M. tuberculosis* sRNA upon stress

| sRNA   | H <sub>2</sub> O <sub>2</sub> | MMC     | pH <sub>ctr</sub> | pH <sub>5.0</sub> <sup>*</sup> |
|--------|-------------------------------|---------|-------------------|--------------------------------|
| B11    | 1.8±0.6                       | 1.1±0.3 | 1.1±0.4           | 1.5±0.6                        |
| B55    | <b>2.4±0.3</b>                | 1.7±0.3 | 1.1±0.4           | 1.2±0.2                        |
| C8     | 1.3±0.5                       | 1.3±0.6 | 1.7±0.9           | 1.3±0.3                        |
| F6     | <b>2.0±0.6</b>                | 1.2±0.4 | 1.0±0.0           | <b>2.1±0.2</b>                 |
| G2     | 1.2±0.2                       | 1.3±0.3 | 1.1±0.1           | 1.4±0.6                        |
| ASdes  | 1.2±0.2                       | 1.1±0.1 | 1.2±0.2           | 1.1±0.2                        |
| ASpks  | <b>2.5±0.1</b>                | 0.9±0.2 | 1.1±0.2           | 1.2±0.3                        |
| AS1726 | 1.4±0.2                       | 1.4±0.2 | 1.1±0.2           | 1.2±0.2                        |
| AS1890 | 1.5±0.2                       | 1.3±0.3 | 1.4±0.2           | 1.1±0.2                        |

---

Values represent mean of three to four independent experiments shown with standard deviation

Induction folds above two are shown in bold

<sup>\*</sup> Induction fold of pH<sub>5.0</sub> is relative to pH<sub>ctr</sub>
